# Supplementary material
Source: ML conference proceedings conference paper supplement (https://proceedings.neurips.cc/paper_files/paper/2017/hash/024d7f84fff11dd7e8d9c510137a2381-Abstract.html)
Supplement: Supplementary file [file 024d7f84fff11dd7e8d9c510137a2381-Supplemental.zip]

---

## Supplementary Material

### Accelerated consensus via Min-Sum Splitting

---

We present, in order, the proofs of Proposition 1, Proposition 2, and Theorem 1.

*Proof of Proposition 1.* First of all, note that the optimization problem (2) can be casted in the unconstrained formulation of problem (1) upon choosing the hard barrier function:  $\phi_{vw}(z, z') := 0$  if  $z = z'$  and  $\phi_{vw}(z, z') := \infty$  otherwise. With this choice, the minimization inside the definition of the message updates in Algorithm 1 admits the trivial solution  $\hat{\mu}_{vw}^s = (\delta - 1)\hat{\xi}_{vw}^s + \delta\hat{\xi}_{vw}^s$ . Hence, Algorithm 1 yields the following update for the messages  $\hat{\mu}^s = (\hat{\mu}_{vw}^s)_{(w,v) \in \mathcal{E}}$ :

$$\begin{aligned} \hat{\mu}_{vw}^s &= (1 - 1/\delta)\phi_v - (\delta - 1)\hat{\mu}_{vw}^{s-1} + (\delta - 1) \sum_{z \in \mathcal{N}(v)} \Gamma_{zv} \hat{\mu}_{zv}^{s-1} \\ &\quad + \phi_w - \delta\hat{\mu}_{vw}^{s-1} + \delta \sum_{z \in \mathcal{N}(w)} \Gamma_{zw} \hat{\mu}_{zw}^{s-1}. \end{aligned} \quad (1)$$

In vector form, this update can be written as  $\hat{\mu}^s = \hat{k}(\delta) + \hat{K}(\delta, \Gamma)\hat{\mu}^{s-1}$ , where  $\hat{k}(\delta)_{vw} := \phi_w + (1 - 1/\delta)\phi_v$ . From the linearity of the message update it follows that if  $\phi_v(z) = \frac{1}{2}z^2 - b_v z$  and if we choose the initial messages to be quadratic functions, then the messages at any time  $s > 0$  will remain quadratic. Namely, if we adopt the parametrization  $\hat{\mu}_{vw}^0(z) = \frac{1}{2}\hat{R}_{vw}^0 z^2 - \hat{r}_{vw}^0 z$ , then we have  $\hat{\mu}_{vw}^s(z) = \frac{1}{2}\hat{R}_{vw}^s z^2 - \hat{r}_{vw}^s z$  with the linear and quadratic parameters updated, respectively, according to  $\hat{R}^s = (2 - 1/\delta)\mathbf{1} + \hat{K}(\delta, \Gamma)\hat{R}^{s-1}$  and  $\hat{r}^s = \hat{h}(\delta) + \hat{K}(\delta, \Gamma)\hat{r}^{s-1}$ . The belief function reads  $\mu_v^t(z) = \phi_v(z) + \delta \sum_{w \in \mathcal{N}(v)} \Gamma_{vw} \hat{\mu}_{vw}^t(z) = \frac{1}{2}[1 + \delta \sum_{w \in \mathcal{N}(v)} \Gamma_{vw} \hat{R}_{vw}^t]z^2 - [b_v + \delta \sum_{w \in \mathcal{N}(v)} \Gamma_{vw} \hat{r}_{vw}^t]z$ . As by assumption  $1 + \delta \sum_{w \in \mathcal{N}(v)} \Gamma_{vw} \hat{R}_{vw}^t > 0$ ,  $x_v^t := \arg \min_{z \in \mathbb{R}} \mu_v^t(z) = \frac{b_v + \delta \sum_{w \in \mathcal{N}(v)} \Gamma_{vw} \hat{r}_{vw}^t}{1 + \delta \sum_{w \in \mathcal{N}(v)} \Gamma_{vw} \hat{R}_{vw}^t}$ .  $\square$

*Proof of Proposition 2.* Recall from Algorithm 1 the definition of the belief function at time  $s$ , i.e.,  $\mu_v^s := \phi_v + \delta \sum_{w \in \mathcal{N}(v)} \Gamma_{vw} \hat{\mu}_{vw}^s$ , and let  $\mu^s \in \mathbb{R}^V$  be the vector whose  $v$ -th component is  $\mu_v^s$ . Let  $\chi^s \in \mathbb{R}^V$  be the vector whose  $v$ -th component is given by the function  $\chi_v^s := \phi_v - \delta \sum_{w \in \mathcal{N}(v)} \Gamma_{vw} \hat{\mu}_{vw}^s$ . Let  $\phi \in \mathbb{R}^V$  be the vector whose  $v$ -th component is the function  $\phi_v$ . By taking the summations of update (1) over  $w \in \mathcal{N}(v)$  and  $v \in \mathcal{N}(w)$ , respectively, and by performing the change of variables as prescribed by the definitions of  $\mu^s$  and  $\chi^s$  (using that  $\Gamma$  is symmetric), we get that the functions  $\mu_v^s$ 's and  $\chi_v^s$ 's evolve according to the linear system  $(\mu^s, \chi^s)^T = K(\delta, \Gamma)(\mu^{s-1}, \chi^{s-1})^T$ , where the matrix  $K(\delta, \Gamma)$  is defined as in (5). From the linearity of the message updates it follows that if we choose the initial messages to be quadratic functions, then the messages at any time  $s > 0$  will remain quadratic. Namely, if we adopt the parametrization  $\mu_v^0(z) = \frac{1}{2}R_v^0 z^2 - r_v^0 z$  and  $\chi_v^0(z) = \frac{1}{2}Q_v^0 z^2 - q_v^0 z$ , then  $\mu_v^s(z) = \frac{1}{2}R_v^s z^2 - r_v^s z$  and  $\chi_v^s(z) = \frac{1}{2}Q_v^s z^2 - q_v^s z$ , where the linear and quadratic parameters are updated according to

$$\begin{pmatrix} r^s \\ q^s \end{pmatrix} = K(\delta, \Gamma) \begin{pmatrix} r^{s-1} \\ q^{s-1} \end{pmatrix}, \quad \begin{pmatrix} R^s \\ Q^s \end{pmatrix} = K(\delta, \Gamma) \begin{pmatrix} R^{s-1} \\ Q^{s-1} \end{pmatrix}.$$

If  $R_v^t > 0$  the final estimates read  $x_v^t := \arg \min_{z \in \mathbb{R}} \mu_v^t(z) = r_v^t / R_v^t$ .  $\square$

*Proof of Theorem 1.* We analyze Algorithm 3 with initial conditions  $R^0 = Q^0 = \mathbf{1}$  and  $r^0 = q^0 = b$ . By Proposition 2, the output of this algorithm coincides with the output of Algorithm 2 with initial

conditions  $\hat{R}^0 = \hat{r}^0 = 0$ . As  $\Gamma = \gamma W$  with  $W\mathbf{1} = \mathbf{1}$ , we have  $\text{diag}(\Gamma\mathbf{1}) = \gamma \text{diag}(\mathbf{1}) = \gamma I$ , and the matrix  $K(\delta, \Gamma)$  in (5) reads as the matrix  $K$  in (6). By the results in [15] (see also [13]), we know that for the choice of  $\gamma$  given in the statement of the theorem the following holds:

1. The matrix  $K$  has an eigenvalue 1 and all the remaining  $2n - 1$  eigenvalues have magnitude strictly less than one.
2. The second largest eigenvalue in magnitude of  $K$  is given by the quantity  $\rho_K$  defined in the statement of the theorem.

It can be verified that

$$(\mathbf{1}, \mathbf{1})^T K = (\mathbf{1}, \mathbf{1})^T, \quad K \begin{pmatrix} \mathbf{1} \\ (1 - \gamma)\mathbf{1} \end{pmatrix} = \begin{pmatrix} \mathbf{1} \\ (1 - \gamma)\mathbf{1} \end{pmatrix}.$$

By Lemma 3 in [24], which is a general version of Theorem 1 in [44], we have  $\lim_{t \rightarrow \infty} W^t = W^\infty$ , where  $W^\infty$  is defined as in (6). By taking the limit for  $t$  that goes to infinity on the two linear systems that define the message updates in Algorithm 3 we get, respectively,

$$\begin{pmatrix} r^\infty \\ q^\infty \end{pmatrix} = K^\infty \begin{pmatrix} r^0 \\ q^0 \end{pmatrix}, \quad \begin{pmatrix} R^\infty \\ Q^\infty \end{pmatrix} = K^\infty \begin{pmatrix} R^0 \\ Q^0 \end{pmatrix},$$

which yield  $r^\infty = \bar{b}R^\infty$ ,  $q^\infty = (1 - \gamma)r^\infty = \bar{b}Q^\infty$ , and  $R^\infty = \frac{2}{2-\gamma}\mathbf{1}$ ,  $Q^\infty = (1 - \gamma)R^\infty$ . Hence, we have  $r_v^\infty / R_v^\infty = \bar{b}$ . The error decomposition

$$x_v^t - \bar{b} = \frac{r_v^t}{R_v^t} - \frac{r_v^\infty}{R_v^\infty} = \frac{r_v^t}{R_v^t} - \frac{r_v^\infty}{R_v^t} + \frac{r_v^\infty}{R_v^t} - \frac{r_v^\infty}{R_v^\infty} = \frac{1}{R_v^t}(r_v^t - r_v^\infty) + \frac{r_v^\infty}{R_v^t R_v^\infty}(R_v^\infty - R_v^t)$$

yields, using that  $R_v^t \geq 1$  and  $\bar{b} < 1$ , by the triangle inequality for the  $\ell_2$  norm  $\|\cdot\|$ ,

$$\|x^t - \bar{b}\mathbf{1}\| \leq \|r^t - r^\infty\| + \|R^t - R^\infty\| \leq 2 \max\{\|r^t - r^\infty\|, \|R^t - R^\infty\|\}.$$

We first bound the term for the quadratic parameters. As

$$\begin{pmatrix} R^t - R^\infty \\ Q^t - Q^\infty \end{pmatrix} = (K - K^\infty) \begin{pmatrix} R^{t-1} \\ Q^{t-1} \end{pmatrix} = (K - K^\infty) \begin{pmatrix} R^{t-1} - R^\infty \\ Q^{t-1} - Q^\infty \end{pmatrix},$$

we have

$$\begin{pmatrix} R^t - R^\infty \\ Q^t - Q^\infty \end{pmatrix} = (K - K^\infty)^t \begin{pmatrix} R^0 - R^\infty \\ Q^0 - Q^\infty \end{pmatrix},$$

from which it follows that

$$\|R^t - R^\infty\| \leq \left\| \begin{pmatrix} R^t - R^\infty \\ Q^t - Q^\infty \end{pmatrix} \right\| \leq \|(K - K^\infty)^t\| \left\| \begin{pmatrix} R^0 - R^\infty \\ Q^0 - Q^\infty \end{pmatrix} \right\|.$$

Given that

$$\left\| \begin{pmatrix} R^0 - R^\infty \\ Q^0 - Q^\infty \end{pmatrix} \right\| = \sqrt{\|\mathbf{1} - R^\infty\|_2^2 + \|\mathbf{1} - Q^\infty\|_2^2},$$

with  $\|\mathbf{1} - R^\infty\|_2^2 = \|\mathbf{1} - Q^\infty\|_2^2 = \frac{\gamma^2}{(2-\gamma)^2}n$ , we get  $\|R^t - R^\infty\| \leq \|(K - K^\infty)^t\| \frac{\gamma}{2-\gamma} \sqrt{2n}$ . Proceeding analogously for the linear parameters, we find  $\|r^t - r^\infty\| \leq \|(K - K^\infty)^t\| \sqrt{\|r^0 - r^\infty\|_2^2 + \|q^0 - q^\infty\|_2^2}$ . We have  $\|r^0 - r^\infty\| = \|b - \bar{b}R^\infty\| = \|b - \bar{b}\mathbf{1} + \bar{b}\mathbf{1} - \bar{b}R^\infty\| \leq \|b - \bar{b}\mathbf{1}\| + \|\bar{b}\mathbf{1} - \bar{b}R^\infty\|$  so that  $\|r^0 - r^\infty\| \leq \sqrt{n} + \frac{\gamma}{(2-\gamma)}\sqrt{n} = \frac{2}{(2-\gamma)}\sqrt{n}$ . In the same way we get  $\|q^0 - q^\infty\| = \|b - \bar{b}Q^\infty\| \leq \frac{2}{(2-\gamma)}\sqrt{n}$ . All together,  $\|r^t - r^\infty\| \leq \|(K - K^\infty)^t\| \frac{2}{2-\gamma} \sqrt{2n}$ . Finally, as  $\gamma < 2$  we obtain  $\|x^t - \bar{b}\mathbf{1}\| \leq \frac{4}{2-\gamma} \sqrt{2n} \|(K - K^\infty)^t\|$ .

It can be checked that for  $z \in [0, 1]$  the following inequalities hold

$$1 - 2z \leq \sqrt{\frac{1 - \sqrt{1 - (1 - z^2)^2}}{1 + \sqrt{1 - (1 - z^2)^2}}} \leq 1 - z.$$

Upon choosing  $\rho_W = 1 - z^2$ , we recover the bounds stated at the end of Theorem 1.  $\square$
